# Supplementary material
Source: bioRxiv or medRxiv preprint supplement (https://www.medrxiv.org/highwire/filestream/87343/field_highwire_adjunct_files/0/2020.06.23.20138289-1.pdf)

# Extended data Fig1: Age and BMI cohort distributions and Select Medications distribution

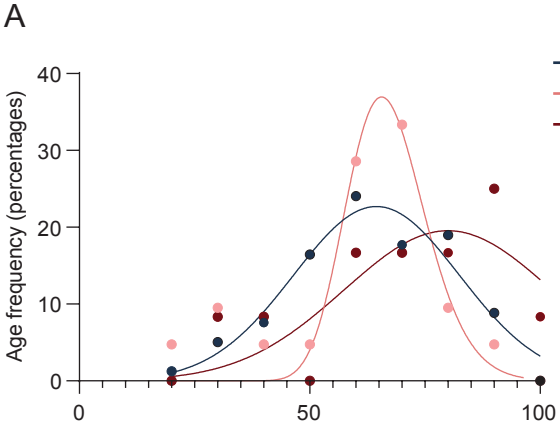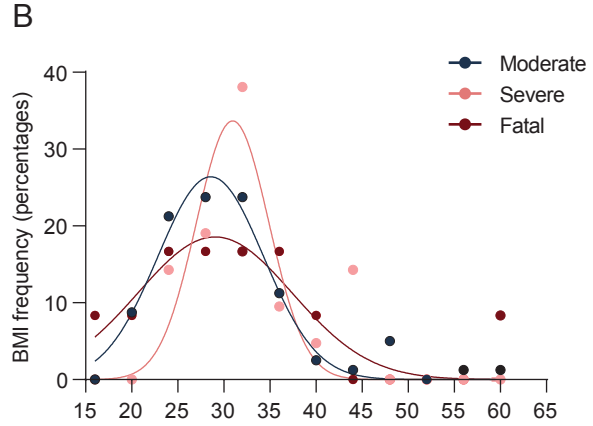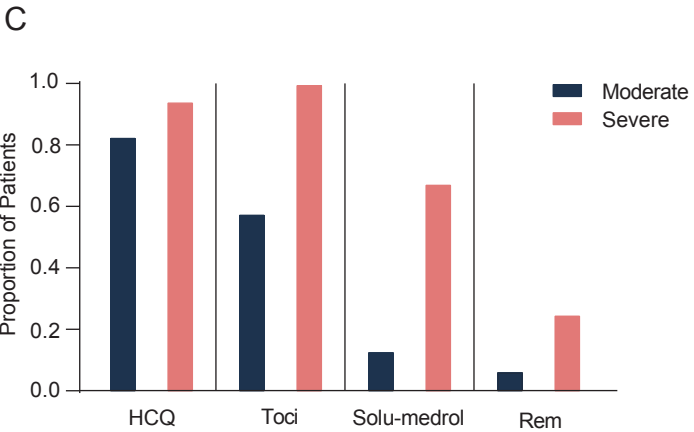

**D**

Changes in IL-6, according to tocilizumab, after controlling, age, ICU admission and days from symptom onset, accounting for multiple observations per person (GEE).

| Covariate               | Coefficient | 95% CI            |
|-------------------------|-------------|-------------------|
| <b>Tocilizumab</b>      | <b>0.55</b> | <b>0.07, 1.04</b> |
| ICU admission           | 0.48        | -0.02, 0.99       |
| Days from symptom onset | -0.02       | -0.04, -0.003     |
| Age                     | 0.01        | 0.0003, 0.02      |

This analysis excludes two individuals whose IL-6 was measured before receiving tocilizumab.

  

Changes in T cell count, according to age, ICU admission and days from symptom onset, accounting for multiple observations per person (GEE).

| Covariate               | Coefficient  | 95% CI             |
|-------------------------|--------------|--------------------|
| ICU admission           | -13.43       | -19.32, -7.55      |
| Days from symptom onset | -0.15        | -0.41, 0.11        |
| <b>Age</b>              | <b>-0.16</b> | <b>-0.33, 0.02</b> |



**Extended Data Fig3: Overview of cytokine and chemokine profiles of COVID-19 patients**

**A**

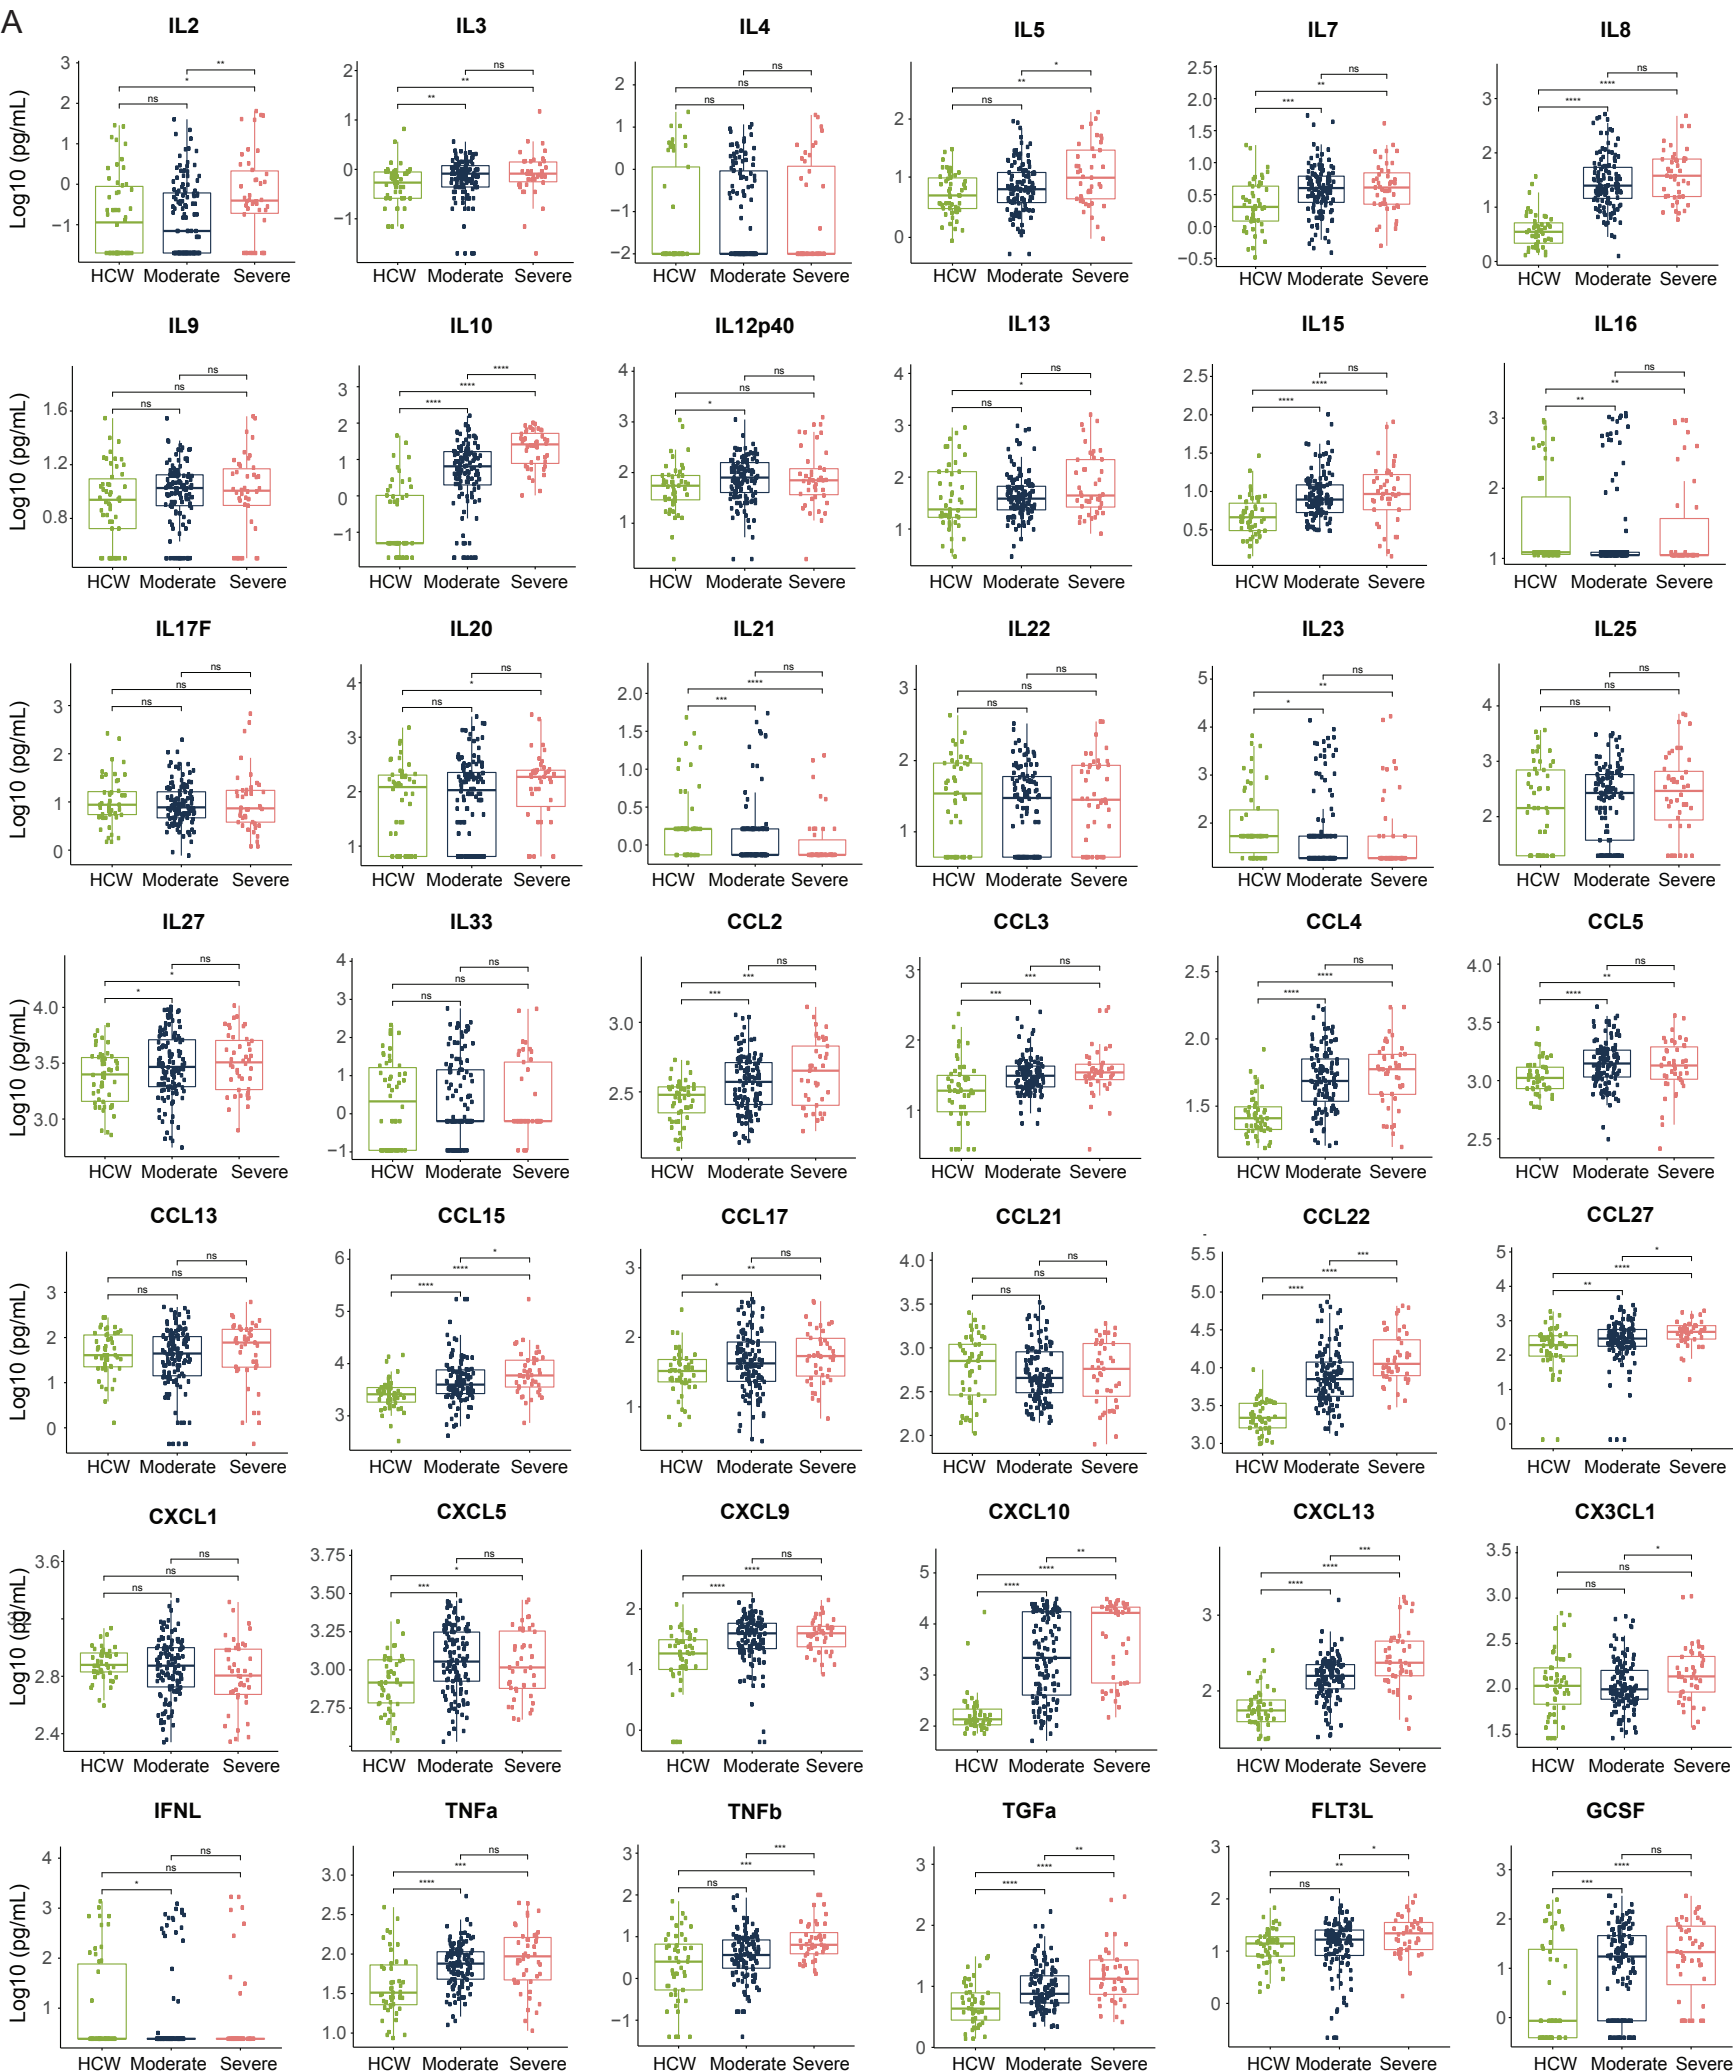

### Extended Data Fig3: Overview of cytokine and chemokine profiles of COVID-19 patients

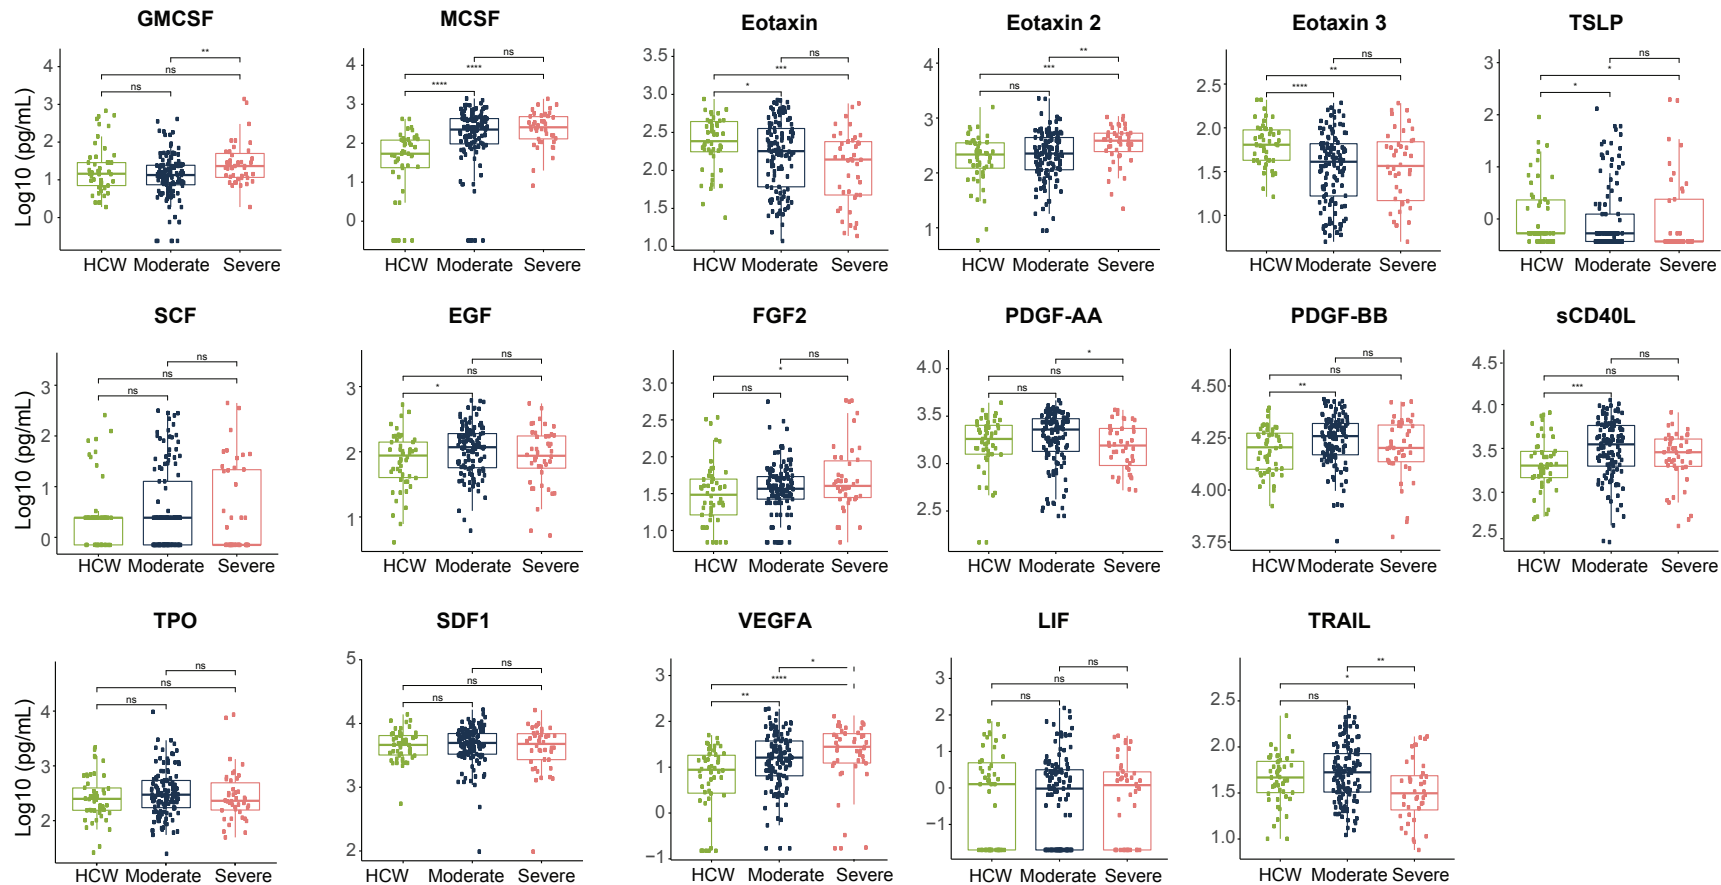

# Extendend Data Fig 4: Longitudinal cytokine and chemokine profiles in COVID-19 patients

— Severe  
— Moderate

A

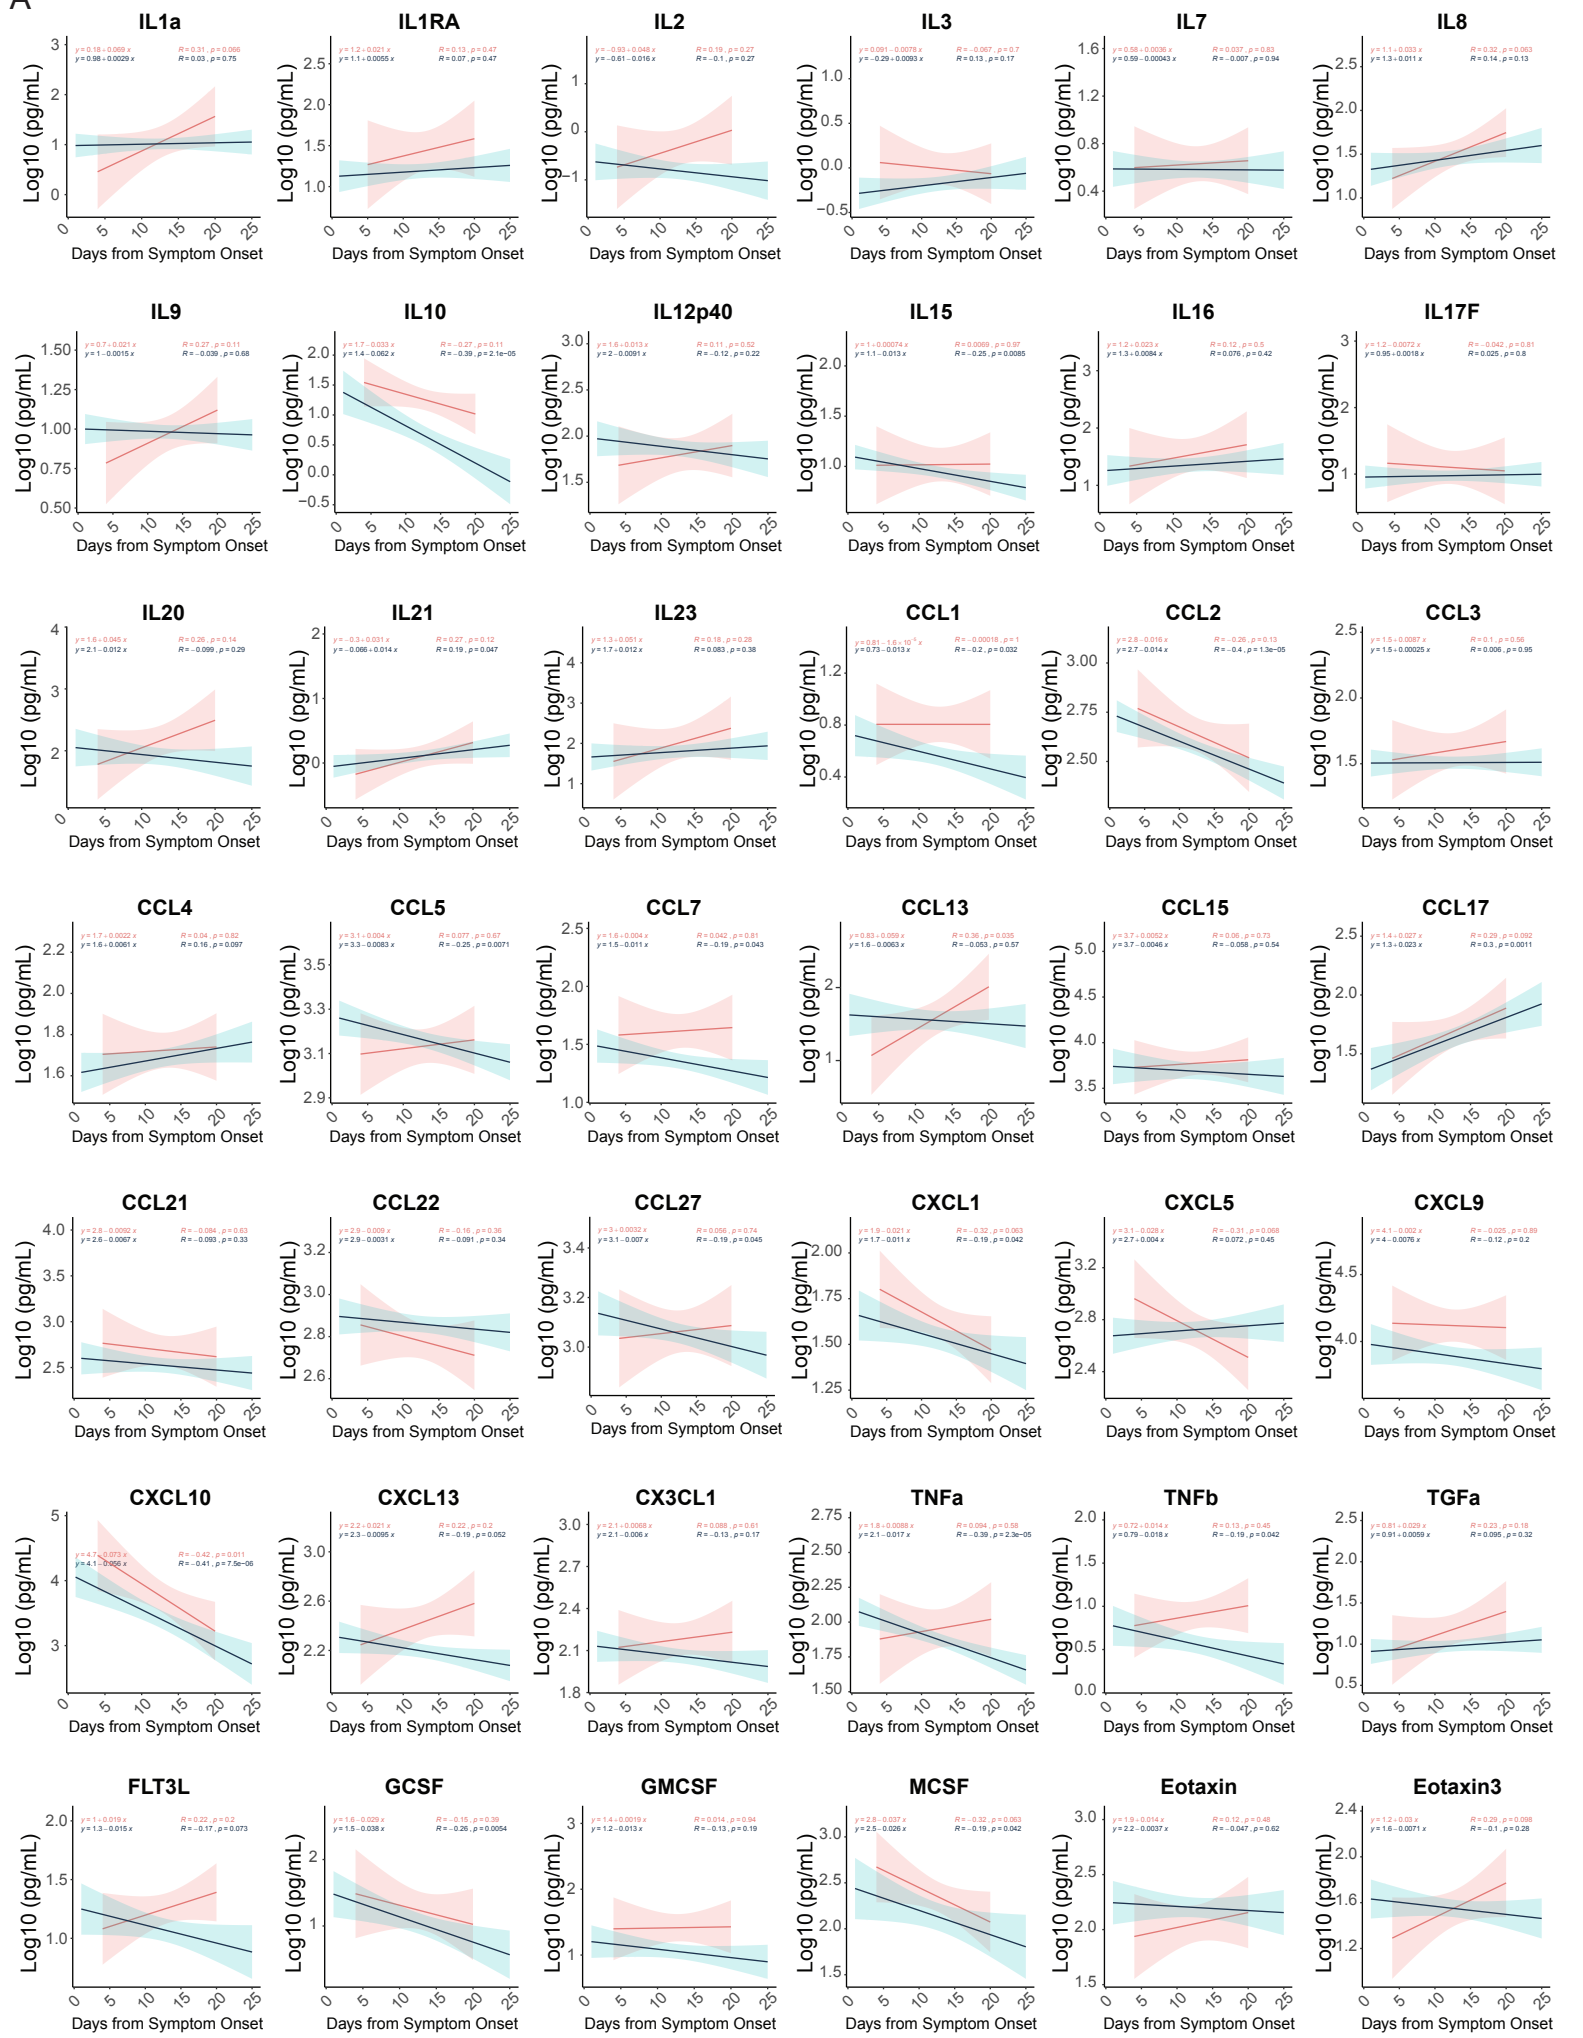

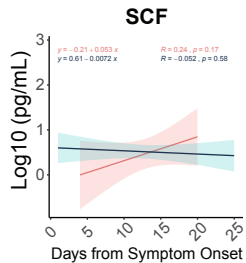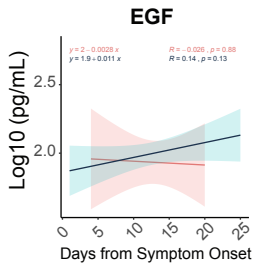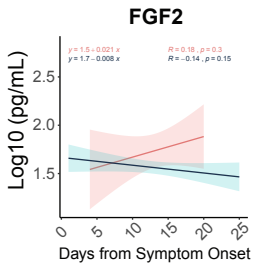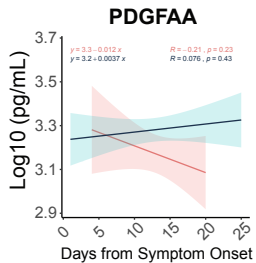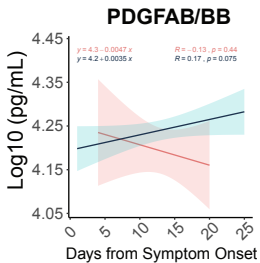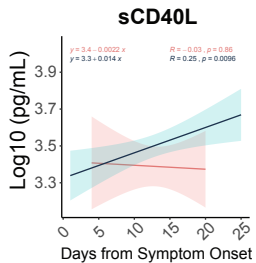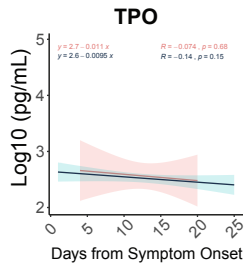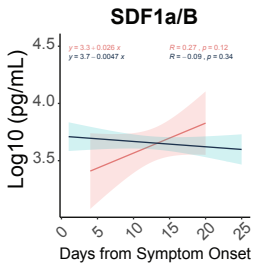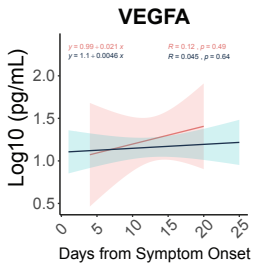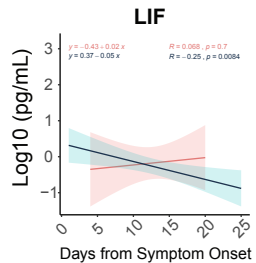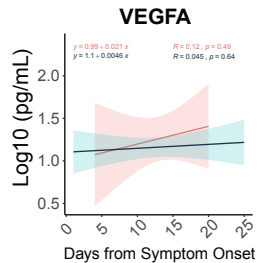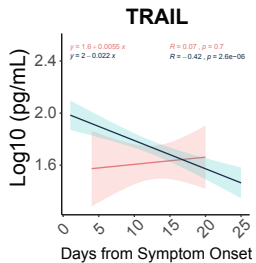

# Extended Data Fig.5: T cell immune profile in moderate vs. severe patients

**A**

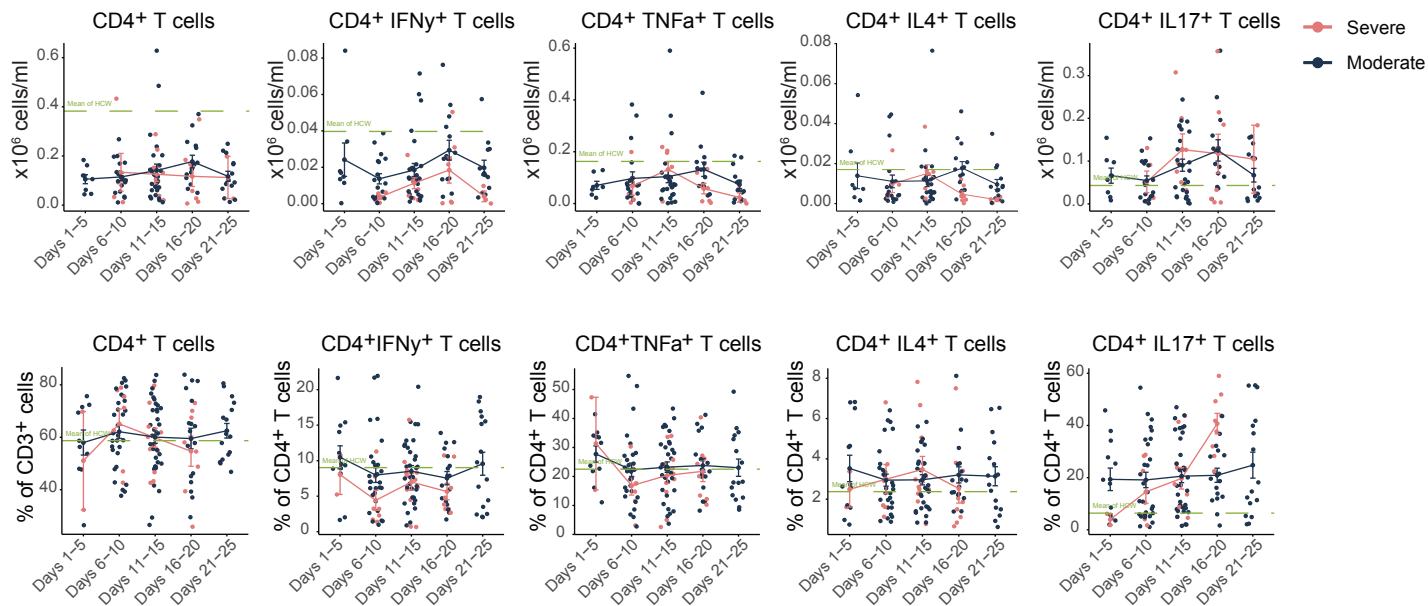

**B**

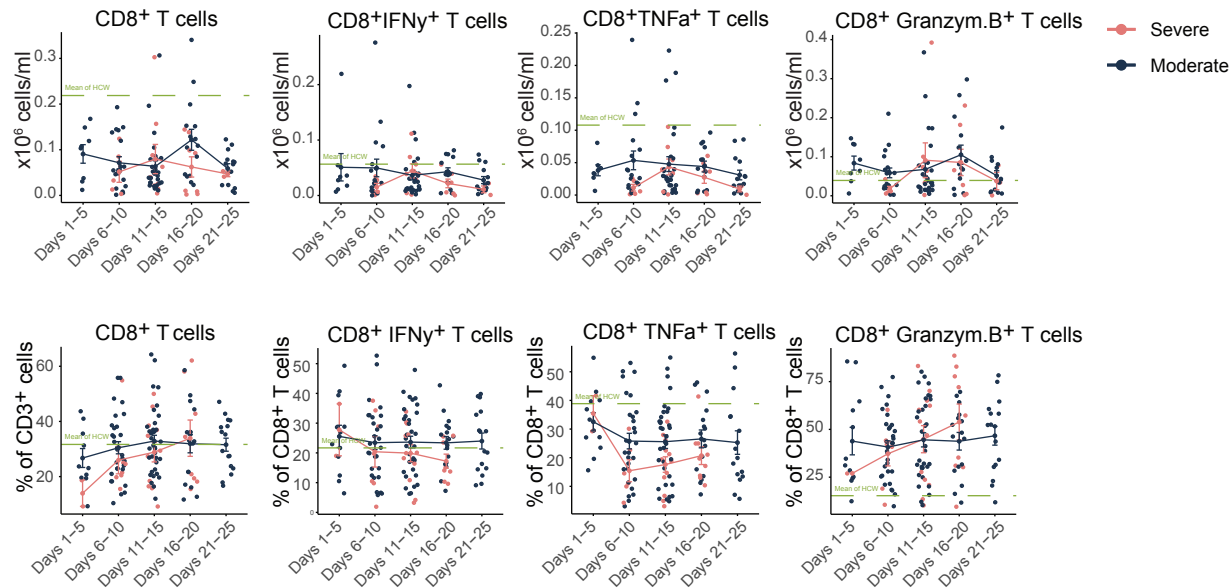





**Extended Data Fig 7: Distribution of days from symptom onset stratified by collection time point**

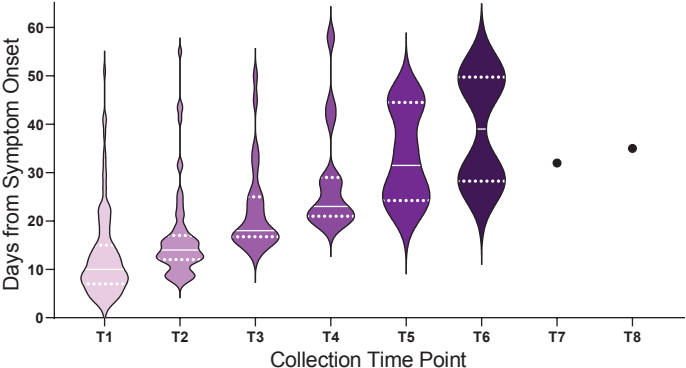

# Extended Data Fig 8: Risk of death according to biomarkers levels

Risk of death:

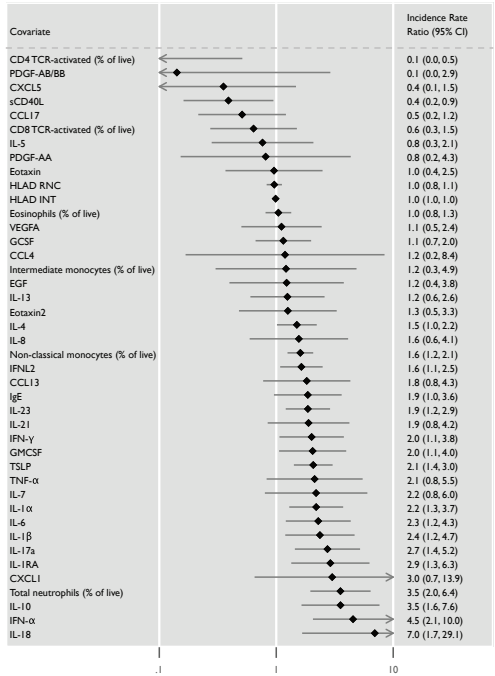

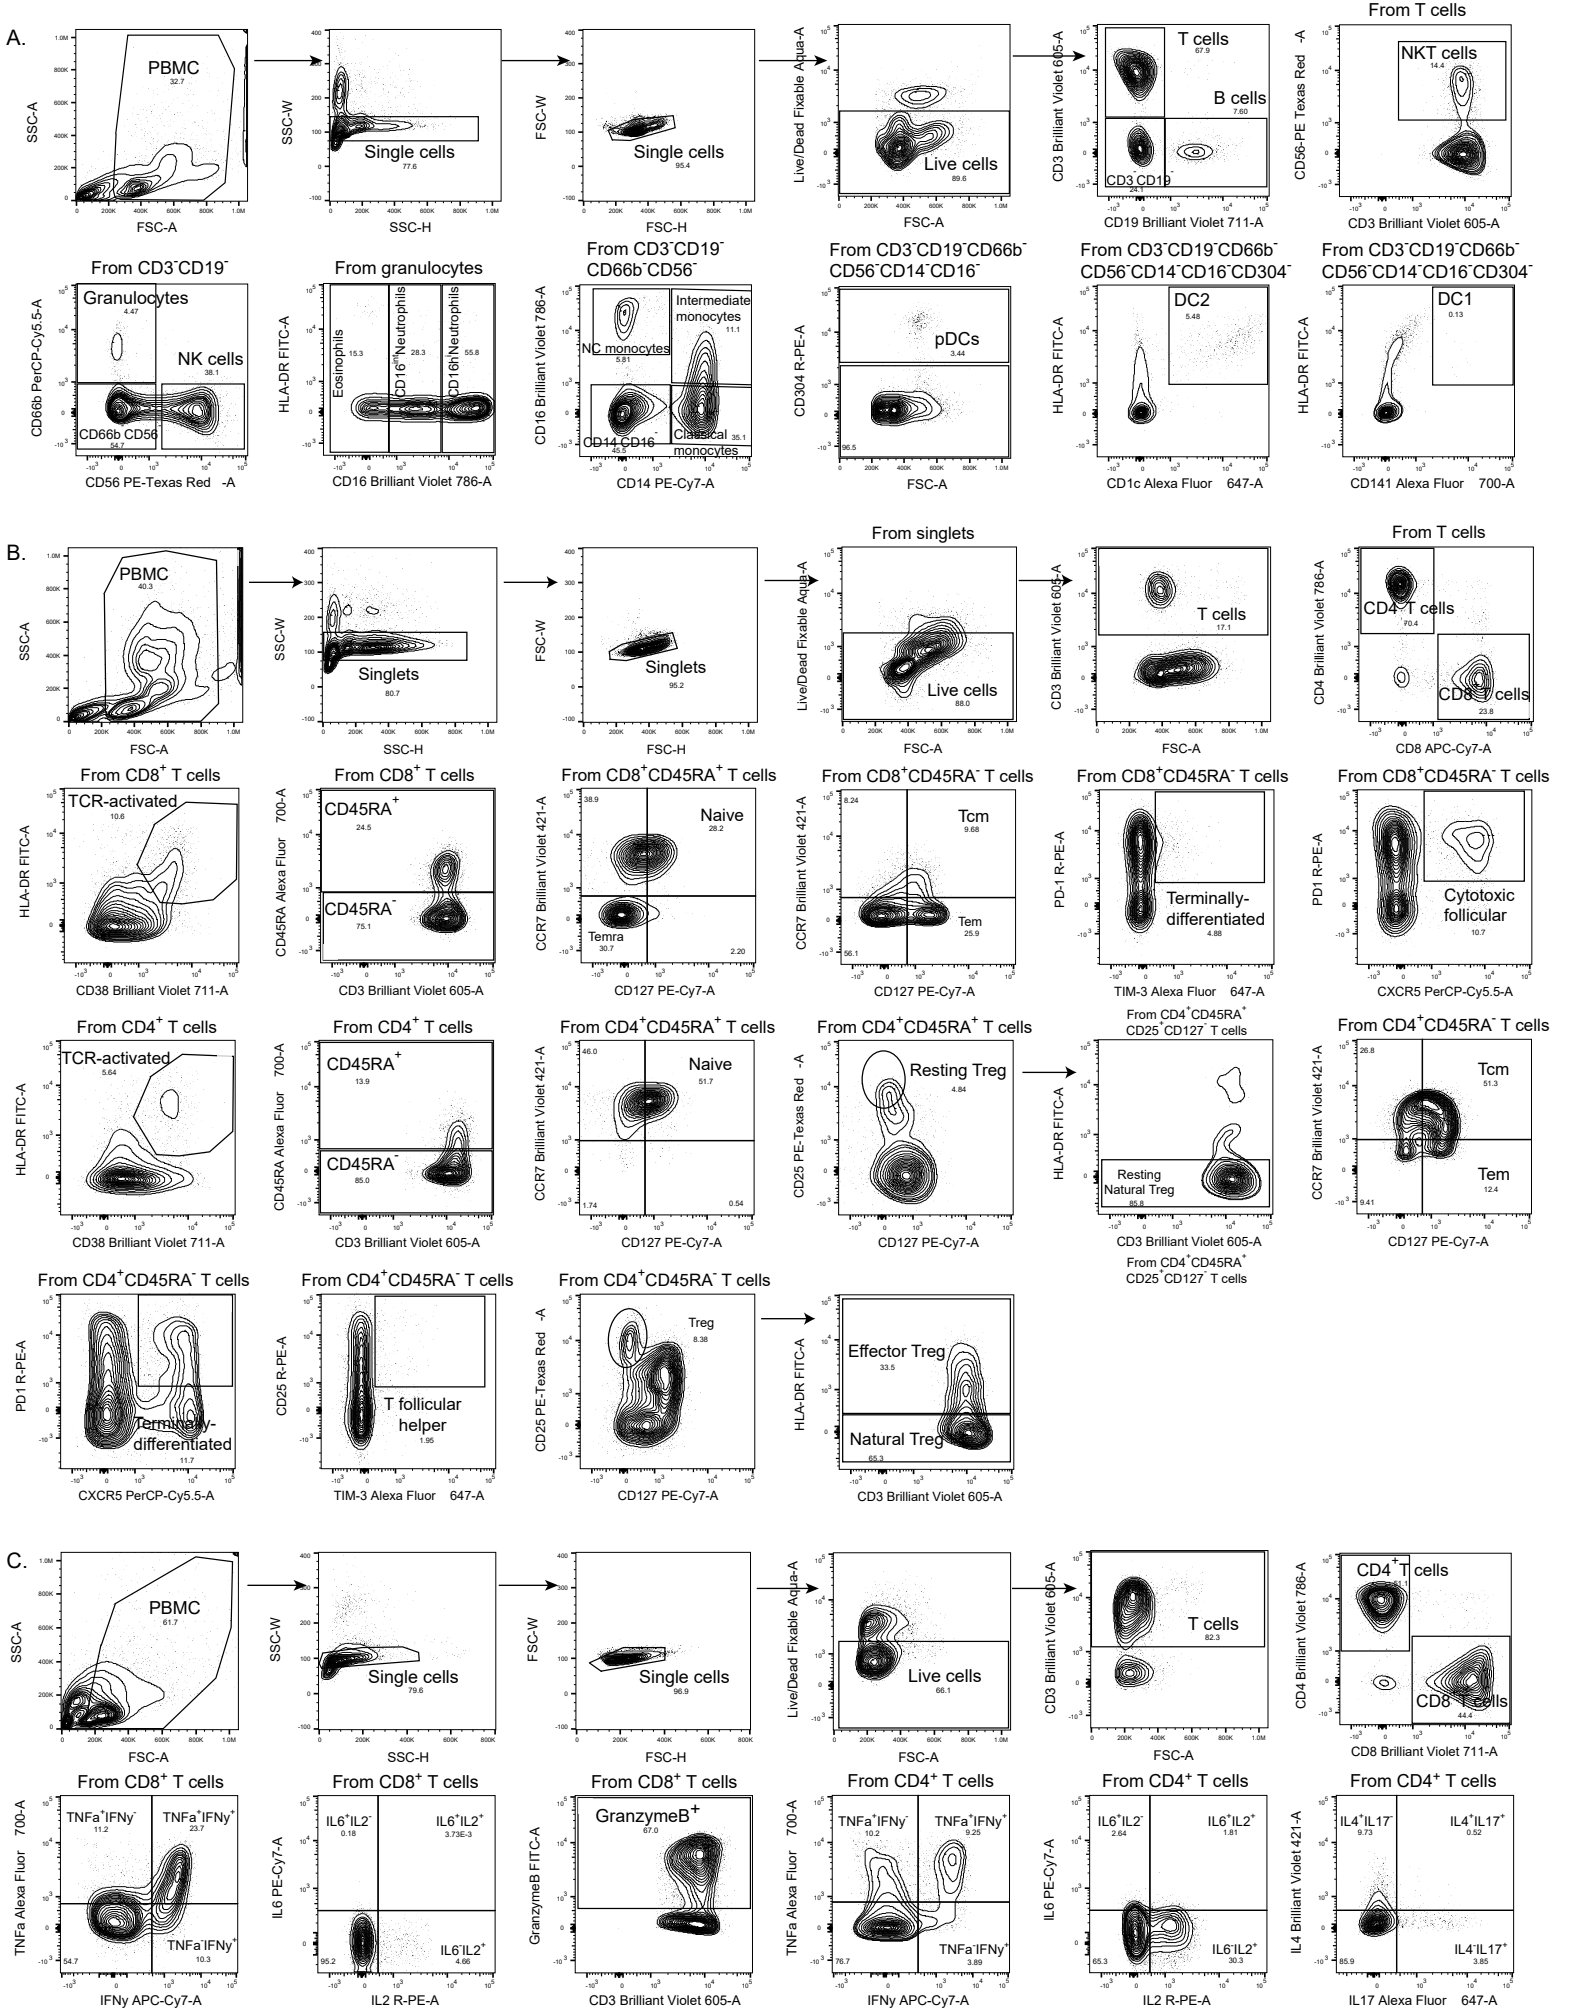

Supplement: Supplementary file [file 2020.06.23.20138289-1.pdf]
